# Supplementary material for: Modular, inducible, and titratable expression systems for Escherichia coli and Acinetobacter baumannii
Source: PubMed Central journal article supplement (PMC11160707; doi:10.1101/2024.05.28.596346), 2024-05-29
Supplement: media-1.pdf [file media-1.pdf]

**Figure S1 Conjugation and transposition efficiencies.** **(A)** Dot plot of conjugation efficiency of the replicative vector to the recipient strain (*A. baumannii* ATCC 17978 or *E. coli* BW25113) after ~3-hour incubations. Bars represent mean efficiencies (n=3). Dashed line is drawn at the limit of detection, defined by the maximum number of colony-forming units (CFUs) observed on non-selective plates in each experiment. **(B)** Dot plot showing transposition efficiency of the Tn7 transposon into the *att*<sub>Tn7</sub> site of *A. baumannii* ATCC 17978 or *E. coli* BW25113 after ~4-hour incubation with donor strains, one carrying the Tn7 transposon vector and another carrying the Tn7 transposase vector. Bars represent mean efficiencies (n=3); dashed line shows limit of detection. **(C)** Table showing instances of carbenicillin-resistant (CarbR) transconjugants of 40 isolates tested for Tn7 co-integrates in *A. baumannii* and *E. coli*.

**Figure S2 Titration of P<sub>abstBR</sub> expression.** Expression from **(A)** the replicative plasmid vector or **(B)** the Tn7 transposon. Plots shown are normalized sfGFP levels expressed from P<sub>abstBR</sub> across IPTG concentrations for *A. baumannii* ATCC 19606 and *A. baumannii* AB5075. Error bars represent standard deviation (n=3 for replicative vector, n=6 for Tn7 transposon).

**A** Plasmid transfer - biparental mating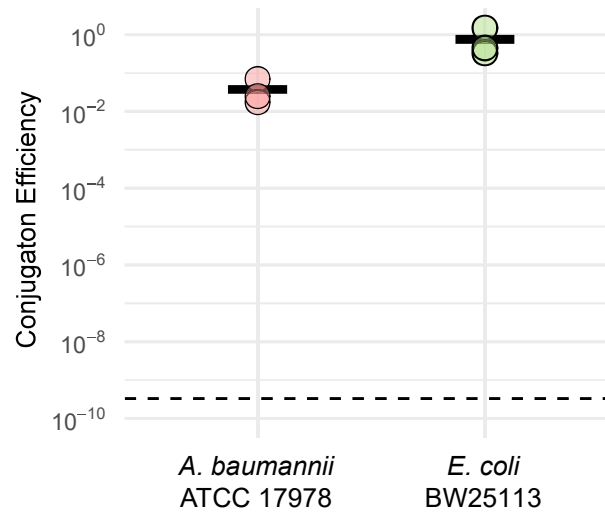**B** Tn7 integration - triparental mating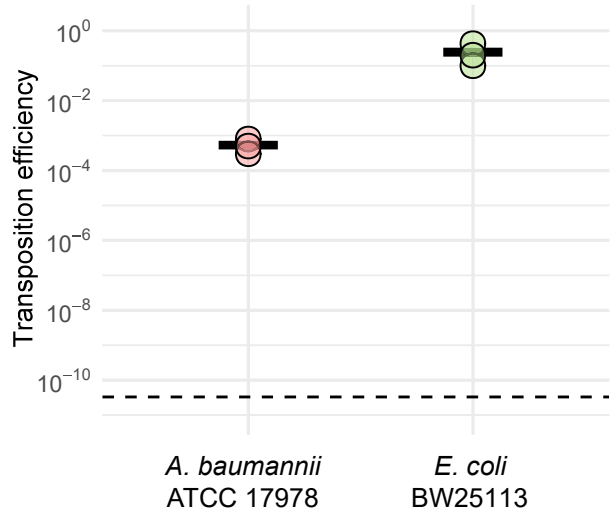**C****Co-integrates: CarbR Tn7 transconjugants**

|                    | Strain                         |                        |
|--------------------|--------------------------------|------------------------|
|                    | <i>A. baumannii</i> ATCC 17978 | <i>E. coli</i> BW25113 |
| Tn7 vector - empty | 2/40                           | 0/40                   |
| Tn7 vector - sfGFP | 3/40                           | 1/40                   |

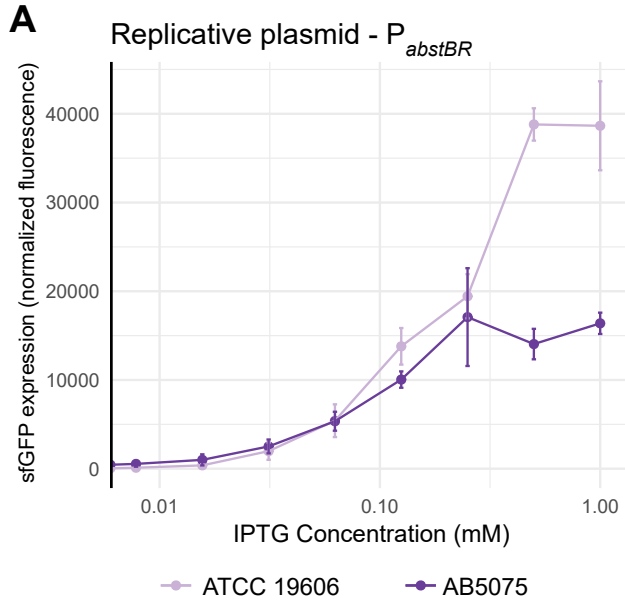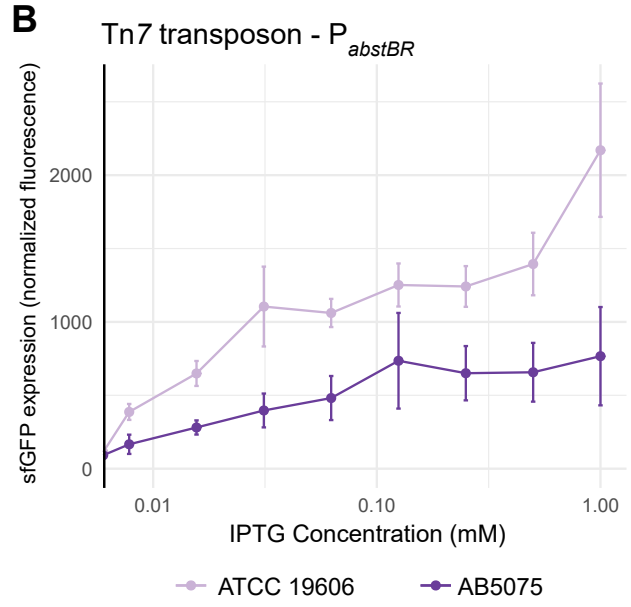

**Supplemental Table S1 Strains**

**Key**

| Term        | Description                                                                       |
|-------------|-----------------------------------------------------------------------------------|
| Strain #    | JMP lab accession number                                                          |
| Description | Descriptive name, genotype, plasmids, construction details, phenotype, usage, etc |
| Source      | Strains produced in this study unless otherwise noted                             |

| Strain #  | Description <sup>a</sup>                                                                                                                                                                                                                                                                                                                                                                                                             | Source                |
|-----------|--------------------------------------------------------------------------------------------------------------------------------------------------------------------------------------------------------------------------------------------------------------------------------------------------------------------------------------------------------------------------------------------------------------------------------------|-----------------------|
| sJMP3053  | <i>Escherichia coli</i> (derived from BW25114) pir+, recA1 cloning strain with anti-CRISPR (attTn7::acrIIA4); Δ( <i>araD-araB</i> )567, Δ <i>lacZ</i> 4787 (::rmB-3), Δ( <i>phoB-phoR</i> )580, l-, <i>galU</i> 95, Δ <i>uidA</i> 3::pir+, recA1, endA9(del-ins)::FRT, <i>rph-1</i> , Δ( <i>rhaD-rhaB</i> )568, <i>hsdR</i> 514, attTn7::acrIIA4                                                                                     | Ward, PMID: 38126769  |
| sJMP3075  | <i>Escherichia coli</i> MG1655 wild-type (sJMP163, CAG80011)                                                                                                                                                                                                                                                                                                                                                                         | Carol Gross, UCSF     |
| sJMP3076  | <i>Escherichia coli</i> BW25113 (sJMP6, CAG74538); F-, Δ( <i>araD-araB</i> )567, Δ <i>lacZ</i> 4787 (::rmB-3), λ-, <i>rph-1</i> , Δ( <i>rhaD-rhaB</i> )568, <i>hsdR</i> 514                                                                                                                                                                                                                                                          | Carol Gross, UCSF     |
| sJMP3257  | <i>Escherichia coli</i> (derived from WM6026) pir+, dap- mating strain with anti-CRISPR (attTn7::acrIIA4); <i>lacIq</i> , <i>rrnB</i> 3, DE <i>lacZ</i> 4787, <i>hsdR</i> 514, DE( <i>araBAD</i> )567, DE( <i>rhaBAD</i> )568, <i>rph-1</i> att-lambda::pAE12-del (oriR6K/cat::frt5), del 4229(dapA)::frt(DAP-), del(endA)::frt, uidA(delMlu)::pir(wt), attHK::pJK1006::del1/2(del oriR6K-cat::frt5, del trfA::frt), attTn7::acrIIA4 | Banta, PMID: 38496613 |
| sJMP3261  | <i>Escherichia coli</i> sJMP3257 mating strain with plasmid pTn7C1 (pJMP1039) transposase expression; ampR, dap-                                                                                                                                                                                                                                                                                                                     | Banta, PMID: 38496613 |
| sJMP3329  | <i>Acinetobacter baumannii</i> ATCC 19606 WT                                                                                                                                                                                                                                                                                                                                                                                         | ATCC                  |
| sJMP3348  | <i>Acinetobacter baumannii</i> ATCC 17978 WT                                                                                                                                                                                                                                                                                                                                                                                         | ATCC                  |
| sJMP3518  | <i>Acinetobacter baumannii</i> AB5075 WT                                                                                                                                                                                                                                                                                                                                                                                             | Colin Manoil, UW      |
| sJMP3683  | <i>E. coli</i> sJMP3257 mating strain with plasmid pJMP3649 (Ptrc EV); kanR, dap-                                                                                                                                                                                                                                                                                                                                                    | this study            |
| sJMP3684  | <i>E. coli</i> sJMP3257 mating strain with plasmid pJMP3650 (Ptrc sfGFP); kanR, dap-                                                                                                                                                                                                                                                                                                                                                 | this study            |
| sJMP3685  | <i>E. coli</i> sJMP3257 mating strain with plasmid pJMP3651 (Pabst EV); kanR, dap-                                                                                                                                                                                                                                                                                                                                                   | this study            |
| sJMP3686  | <i>E. coli</i> sJMP3257 mating strain with plasmid pJMP3652 (Pabst sfGFP); kanR, dap-                                                                                                                                                                                                                                                                                                                                                | this study            |
| sJMP3687  | <i>E. coli</i> sJMP3257 mating strain with plasmid pJMP3653 (PabstBR EV kan); kanR, dap-                                                                                                                                                                                                                                                                                                                                             | this study            |
| sJMP3688  | <i>E. coli</i> sJMP3257 mating strain with plasmid pJMP3654 (PabstBR sfGFP kan); kanR, dap-                                                                                                                                                                                                                                                                                                                                          | this study            |
| sJMP3689  | <i>E. coli</i> sJMP3257 mating strain with plasmid pJMP3664 (PabstBR EV apr); aprR, dap-                                                                                                                                                                                                                                                                                                                                             | this study            |
| sJMP3690  | <i>E. coli</i> sJMP3257 mating strain with plasmid pJMP3666 (PabstBR sfGFP apr); aprR, dap-                                                                                                                                                                                                                                                                                                                                          | this study            |
| sJMP3691  | <i>E. coli</i> sJMP3257 mating strain with plasmid pJMP3665 (PabstBR EV hyg); hygR, dap-                                                                                                                                                                                                                                                                                                                                             | this study            |
| sJMP3692  | <i>E. coli</i> sJMP3257 mating strain with plasmid pJMP3667 (PabstBR sfGFP hyg); hygR, dap-                                                                                                                                                                                                                                                                                                                                          | this study            |
| sJMP3715  | <i>A. baumannii</i> 17978 (sJMP3348) with plasmid pJMP3649 (Ptrc EV); kanR                                                                                                                                                                                                                                                                                                                                                           | this study            |
| sJMP3716  | <i>A. baumannii</i> 17978 (sJMP3348) with plasmid pJMP3650 (Ptrc sfGFP); kanR                                                                                                                                                                                                                                                                                                                                                        | this study            |
| sJMP3717  | <i>A. baumannii</i> 17978 (sJMP3348) with plasmid pJMP3651 (Pabst EV); kanR                                                                                                                                                                                                                                                                                                                                                          | this study            |
| sJMP3718  | <i>A. baumannii</i> 17978 (sJMP3348) with plasmid pJMP3652 (Pabst sfGFP); kanR                                                                                                                                                                                                                                                                                                                                                       | this study            |
| sJMP3719  | <i>A. baumannii</i> 17978 (sJMP3348) with plasmid pJMP3653 (PabstBR EV); kanR                                                                                                                                                                                                                                                                                                                                                        | this study            |
| sJMP3720  | <i>A. baumannii</i> 17978 (sJMP3348) with plasmid pJMP3654 (PabstBR sfGFP); kanR                                                                                                                                                                                                                                                                                                                                                     | this study            |
| sJMP3721  | <i>A. baumannii</i> 19606 (sJMP3329) with plasmid pJMP3664 (PabstBR EV); aprR                                                                                                                                                                                                                                                                                                                                                        | this study            |
| sJMP3722  | <i>A. baumannii</i> 19606 (sJMP3329) with plasmid pJMP3666 (PabstBR sfGFP); aprR                                                                                                                                                                                                                                                                                                                                                     | this study            |
| sJMP3725  | <i>A. baumannii</i> AB5075 (sJMP3518) with plasmid pJMP3665 (PabstBR EV); hygR                                                                                                                                                                                                                                                                                                                                                       | this study            |
| sJMP3726  | <i>A. baumannii</i> AB5075 (sJMP3518) with plasmid pJMP3667 (PabstBR sfGFP); hygR                                                                                                                                                                                                                                                                                                                                                    | this study            |
| sJMP3733  | <i>E. coli</i> BW25113 (sJMP3076) with plasmid pJMP3653 (PabstBR EV); kanR                                                                                                                                                                                                                                                                                                                                                           | this study            |
| sJMP3734  | <i>E. coli</i> BW25113 (sJMP3076) with plasmid pJMP3654 (PabstBR sfGFP); kanR                                                                                                                                                                                                                                                                                                                                                        | this study            |
| sJMP3844  | <i>A. baumannii</i> 17978 (sJMP3348) with attTn7::PrpoE-mRFP reporter (Tn7 from pJMP3748; rpoE promoter sequence from <i>E. coli</i> ), aprR                                                                                                                                                                                                                                                                                         | this study            |
| sJMP3845  | <i>E. coli</i> (sJMP3075) with attTn7::PrpoE-mRFP reporter (Tn7 from pJMP3748; rpoE promoter sequence from <i>E. coli</i> ), aprR                                                                                                                                                                                                                                                                                                    | this study            |
| sJMP4061  | <i>E. coli</i> mating strain with helper plasmid pEVS104 (sJMP2935; helper strain); kanR, dap-                                                                                                                                                                                                                                                                                                                                       | Ward, PMID: 38126769  |
| sJMP12051 | <i>A. baumannii</i> 17978 (sJMP3348) with attTn7::PabstBR-sfGFP (Tn7 from pJMP12049); aprR                                                                                                                                                                                                                                                                                                                                           | this study            |
| sJMP12053 | <i>A. baumannii</i> 17978 (sJMP3348) with attTn7::PabstBR-empty (Tn7 from pJMP12042); aprR                                                                                                                                                                                                                                                                                                                                           | this study            |
| sJMP12055 | <i>A. baumannii</i> 19606 (sJMP3329) with attTn7::PabstBR-sfGFP (Tn7 from pJMP12049); aprR                                                                                                                                                                                                                                                                                                                                           | this study            |
| sJMP12057 | <i>A. baumannii</i> 19606 (sJMP3329) with attTn7::PabstBR-empty (Tn7 from pJMP12042); aprR                                                                                                                                                                                                                                                                                                                                           | this study            |
| sJMP12059 | <i>E. coli</i> BW25113 (sJMP3076) with attTn7::PabstBR-sfGFP (Tn7 from pJMP12049); aprR                                                                                                                                                                                                                                                                                                                                              | this study            |
| sJMP12061 | <i>E. coli</i> BW25113 (sJMP3076) with attTn7::PabstBR-empty (Tn7 from pJMP12042); aprR                                                                                                                                                                                                                                                                                                                                              | this study            |
| sJMP12063 | <i>E. coli</i> sJMP3257 mating strain with plasmid pJMP12042 (Tn7 PabstBR EV); ampR, aprR, dap-                                                                                                                                                                                                                                                                                                                                      | this study            |
| sJMP12065 | <i>E. coli</i> sJMP3257 mating strain with plasmid pJMP12049 (Tn7 PabstBR sfGFP); ampR, aprR, dap-                                                                                                                                                                                                                                                                                                                                   | this study            |
| sJMP12070 | <i>E. coli</i> mating strain with plasmid pJMP3853 (PabstBR RpoE OE vector); kanR, dap-                                                                                                                                                                                                                                                                                                                                              | this study            |
| sJMP12074 | (pJMP3853), aprR, kanR                                                                                                                                                                                                                                                                                                                                                                                                               | this study            |
| sJMP12076 | kanR                                                                                                                                                                                                                                                                                                                                                                                                                                 | this study            |
| sJMP12083 | <i>A. baumannii</i> AB5075 (sJMP3518) with attTn7::PabstBR-empty (Tn7 from pJMP12042); aprR                                                                                                                                                                                                                                                                                                                                          | this study            |
| sJMP12085 | <i>A. baumannii</i> AB5075 (sJMP3518) with attTn7::PabstBR-sfGFP (Tn7 from pJMP12049); aprR                                                                                                                                                                                                                                                                                                                                          | this study            |

<sup>a</sup>ampR, ampicillin resistant; aprR, apramycin resistant; kanR, kanamycin resistant; hygR, hygromycin resistant; dap-, requires diaminopimelic acid.

Supplemental Table S2 Plasmids

**Key**

**Term**

**Description**

Plasmid # JMP lab accession number

Description Descriptive name

Addgene # Addgene accession number (<https://www.addgene.org/>)

Construction/notes Plasmid construction notes, usage, or further details

Promoter-gene Promoter used for expressing specific gene or reporter (if applicable)

Resistance Antibiotic resistance cassette(s)

Source plasmids produced in this study unless otherwise noted

**Key plasmids from this study are shown in bold**

| Plasmid #        | Description                                                        | Addgene # | Construction/notes                                                                                                                                                                                                                                                                                                                 | Promoter-gene        | Resistance <sup>a</sup> | Source                 |
|------------------|--------------------------------------------------------------------|-----------|------------------------------------------------------------------------------------------------------------------------------------------------------------------------------------------------------------------------------------------------------------------------------------------------------------------------------------|----------------------|-------------------------|------------------------|
| pJMP0631         | Tiny Tn7 vector                                                    |           | pTinyTn7 plasmid, R6k ori vector with Tn7 transposon with kanR cassette                                                                                                                                                                                                                                                            | na                   | ampR, kanR              | Hall, PMID: 37662258   |
| pJMP1039         | pTn7C1                                                             | 119239    | Tn7 transposase expression                                                                                                                                                                                                                                                                                                         | na                   | ampR                    | Peters, PMID: 30617347 |
| pJMP2748         | vector that contains GFP                                           |           | sfGFP is on this vector for amplification                                                                                                                                                                                                                                                                                          | na                   | ampR, gentR             | Ward, PMID: 38126769   |
| pJMP3067         | pTrc99a                                                            |           | pTrc99a expression plasmid, pBR322 ori expression vector containing IPTG inducible trc promoter                                                                                                                                                                                                                                    | Ptrc-empty           | ampR                    | Rhodius, PMID:16336047 |
| pJMP3262         | pJQ200SK with p15A ori                                             | 78497     | pJQ200SK_gent-sacB vector containing E. coli p15A origin of replication                                                                                                                                                                                                                                                            | na                   | gentR                   | Quandt, PMID: 8486283  |
| pJMP3341         | Tiny Tn7 with NcoI site removed                                    |           | Tiny-Tn7 plasmid; HiFi assembly to delete NcoI sites from pJMP631 with o1255/1258 and o1256/1257 amplified from pJMP631                                                                                                                                                                                                            | na                   | ampR, kanR              | this study             |
| pJMP3347         | pSGAb- $\lambda$ m with pWH1266 ori                                | 121999    | plasmid containing pWH1266 A. baumannii origin of replication                                                                                                                                                                                                                                                                      | na                   | kanR                    | Wang, PMID: 31548010   |
| pJMP3352         | Old Ptrc-EV expression vector, R6k version                         |           | overexpression plasmid containing pTrc99a expression system, Ecoli R6K gamma origin, Abaumannii pWH1266 origin; (requires pir to replicate in E. coli)                                                                                                                                                                             | Ptrc-empty           | kanR                    | this study             |
| pJMP3361         | Old Ptrc-GFP expression vector, R6k version                        |           | overexpression plasmid containing Ptrc promoter expressing GFP, Ecoli R6K gamma origin, Abaumannii pWH1266 origin; HiFi assembled sfGFP gene amplified from pJMP2748 with oJMP1253/oMP1254 into pJMP3352 cut with NcoI/BamHI; (requires pir to replicate in E. coli)                                                               | Ptrc-GFP             | kanR                    | this study             |
| pJMP3407         | Old Pabst-EV expression vector, R6k version                        |           | overexpression plasmid containing Pabst promoter, Ecoli R6K ori, Abaumannii pWH1266 ori; constructed by PCR amplifying pJMP3352 with oJMP2040 and oJMP2041, and HiFi assembling with gblock oJMP2039 and pJMP3352 digested with EcoRI (used larger piece from digest via gel purification); (requires pir to replicate in E. coli) | Pabst-empty          | kanR                    | this study             |
| pJMP3434         | Old Pabst-GFP expression vector, R6k version                       |           | overexpression plasmid containing Pabst promoter expressing GFP, Ecoli R6K gamma origin, Abaumannii pWH1266 origin; HiFi assembled sfGFP gene amplified from pJMP2748 with oJMP1253/oMP1254 into pJMP3407 cut with NcoI/BamHI; (requires pir to replicate in E. coli)                                                              | Pabst-GFP            | kanR                    | this study             |
| <b>pJMP3649</b>  | <b>Ptrc EV kan - replicative vector used in this study</b>         |           | <b>Ptrc OE empty vector with p15A(ACYC) and pWH1266 origins; constructed by digesting pJMP3352 with AscI/PmeI, and HiFi assembling with PCR product of oJMP2134 and oJMP2135 amplified from pJQ200SK</b>                                                                                                                           | <b>Ptrc-empty</b>    | <b>kanR</b>             | <b>this study</b>      |
| pJMP3650         | Ptrc GFP kan - replicative vector used in this study               |           | Ptrc-GFP expression vector with p15A(ACYC) and pWH1266 origins; constructed by digesting pJMP3361 with AscI/PmeI, and HiFi assembling with PCR product of oJMP2134 and oJMP2135 amplified from pJQ200SK                                                                                                                            | Ptrc-GFP             | kanR                    | this study             |
| <b>pJMP3651</b>  | <b>Pabst EV kan - replicative vector used in this study</b>        |           | <b>Pabst OE empty vector with p15A(ACYC) and pWH1266 origins; constructed by digesting pJMP3407 with AscI/PmeI, and HiFi assembling with PCR product of oJMP2134 and oJMP2135 amplified from pJQ200SK</b>                                                                                                                          | <b>Pabst-empty</b>   | <b>kanR</b>             | <b>this study</b>      |
| pJMP3652         | Pabst GFP kan - replicative vector used in this study              |           | Pabst-GFP expression vector with p15A(ACYC) and pWH1266 origins; constructed by digesting pJMP3434 with AscI/PmeI, and HiFi assembling with PCR product of oJMP2134 and oJMP2135 amplified from pJQ200SK                                                                                                                           | Pabst-GFP            | kanR                    | this study             |
| <b>pJMP3653</b>  | <b>PabstBR EV kan - replicative vector used in this study</b>      | *         | <b>PabstBR OE empty vector with p15A(ACYC) and pWH1266 origins; constructed by digesting pJMP4481 with AscI/PmeI, and HiFi assembling with PCR product of oJMP2134 and oJMP2135 amplified from pJQ200SK</b>                                                                                                                        | <b>PabstBR-empty</b> | <b>kanR</b>             | <b>this study</b>      |
| <b>pJMP3654</b>  | <b>PabstBR GFP kan - replicative vector used in this study</b>     | *         | <b>PabstBR-GFP expression vector with p15A(ACYC) and pWH1266 origins; constructed by digesting pJMP4491 with AscI/PmeI, and HiFi assembling with PCR product of oJMP2134 and oJMP2135 amplified from pJQ200SK</b>                                                                                                                  | <b>PabstBR-GFP</b>   | <b>kanR</b>             | <b>this study</b>      |
| <b>pJMP3664</b>  | <b>PabstBR EV apr - replicative vector used in this study</b>      | *         | <b>Apramycin version of pJMP3653 (PabstBR-empty vector); digested pJMP3653 with XhoI, HiFi assembled with gblock oJMP1946</b>                                                                                                                                                                                                      | <b>PabstBR-empty</b> | <b>aprR</b>             | <b>this study</b>      |
| <b>pJMP3665</b>  | <b>PabstBR EV hyg - replicative vector used in this study</b>      | *         | <b>Hygromycin version of pJMP3653 (PabstBR-empty vector); digested pJMP3653 with XhoI, HiFi assembled with gblock oJMP2117</b>                                                                                                                                                                                                     | <b>PabstBR-GFP</b>   | <b>hygR</b>             | <b>this study</b>      |
| pJMP3666         | PabstBR GFP apr - replicative vector used in this study            | *         | Apramycin version of pJMP3654 (PabstBR-empty vector); digested pJMP3654 with XhoI, HiFi assembled with gblock oJMP1946                                                                                                                                                                                                             | PabstBR-empty        | aprR                    | this study             |
| pJMP3667         | PabstBR GFP hyg - replicative vector used in this study            | *         | Hygromycin version of pJMP3654 (PabstBR-empty vector); digested pJMP3654 with XhoI, HiFi assembled with gblock oJMP2117                                                                                                                                                                                                            | PabstBR-GFP          | hygR                    | this study             |
| pJMP3748         | Tn7 PrpoE-mRFP reporter vector                                     |           | Integrative expression vector with PrpoE-mRFP reporter on Tn7 transposon; derived from pJMP8602 by adding PrpoE in front of mRFP reporter using oligos oJMP2369 and oJMP2370                                                                                                                                                       | PrpoE-mRFP           | ampR, aprR              | this study             |
| pJMP3853         | PabstBR rpoE OE vector kan                                         |           | PabstBR-RpoE expression vector, parent pJMP3653; HiFi assembled rpoE gene amplified from E. coli sJMP3075 gDNA with oJMP2634 and oJMP2635 into pJMP3653 digested with NcoI/BamHI                                                                                                                                                   | PabstBR-RpoE         | kanR                    | this study             |
| pJMP4003         | pEVS104 helper plasmid                                             | 207393    | pEVS104(R6K ori, KanR, Tra+)                                                                                                                                                                                                                                                                                                       | na                   | kanR                    | Stabb, PMID: 12474404  |
| pJMP4481         | Old PabstBR-EV expression vector, R6k version                      |           | Overexpression plasmid containing PabstBR promoter, Ecoli R6K ori, Abaumannii pWH1266 ori; constructed by site-directed mutagenesis using pJMP3407 and oJMP2167; (requires pir to replicate in E. coli)                                                                                                                            | PabstBR-empty        | kanR                    | this study             |
| pJMP4491         | Old PabstBR-GFP expression vector, R6k version                     |           | Overexpression plasmid containing PabstBR promoter expressing GFP, Ecoli R6K gamma origin, Abaumannii pWH1266 origin; HiFi assembled sfGFP gene amplified from pJMP2748 with oJMP1253/oMP1254 into pJMP4481 cut with NcoI/BamHI; (requires pir to replicate in E. coli)                                                            | PabstBR-GFP          | kanR                    | this study             |
| pJMP8602         | Old vector containing Tn7 base                                     |           | Tn7 expression vector with mRFP reporter on Tn7 transposon                                                                                                                                                                                                                                                                         | none-mRFP            | kanR                    | Hall, PMID: 37662258   |
| <b>pJMP12042</b> | <b>Tn7 PabstBR EV apr - integrative vector used in this study</b>  | *         | <b>Integrative expression vector with PabstBR empty vector on Tn7 transposon; constructed by amplifying pJMP3653 with oJMP2539 and oJMP2540, pJMP8602 with oJMP2541 and oJMP2542, pJMP3352 with oJMP2543 and oJMP2544, and HiFi assembling with pJMP3539 digested with SpeI/NotI</b>                                               | <b>PabstBR-empty</b> | <b>ampR, aprR</b>       | <b>this study</b>      |
| <b>pJMP12049</b> | <b>Tn7 PabstBR GFP apr - integrative vector used in this study</b> | *         | <b>Integrative expression vector with PabstBR-GFP on Tn7 transposon; constructed by digesting pJMP12042 with NcoI/BamHI, and HiFi assembling with PCR product of oJMP1254 and oJMP2078 amplified from pJMP2748</b>                                                                                                                 | <b>PabstBR-GFP</b>   | <b>ampR, aprR</b>       | <b>this study</b>      |
| <b>pJMP12068</b> | <b>Tn7 PabstBR EV kan - integrative vector used in this study</b>  | *         | <b>Kanamycin version of pJMP12042 (Tn7-PabstBR-empty vector); HiFi assembled PCR product of pJMP3653 with oJMP0193 and oJMP0194 into pJMP12042 digested with XhoI</b>                                                                                                                                                              | <b>PabstBR-empty</b> | <b>ampR, kanR</b>       | <b>this study</b>      |
| <b>pJMP12089</b> | <b>Tn7 PabstBR EV hyg - integrative vector used in this study</b>  | *         | <b>Hygromycin version of pJMP12042 (Tn7-PabstBR-empty vector); digested pJMP12042 with XhoI, HiFi assembled with gblock oJMP2117</b>                                                                                                                                                                                               | <b>PabstBR-empty</b> | <b>ampR, hygR</b>       | <b>this study</b>      |

<sup>a</sup>ampR, ampicillin resistant; aprR, apramycin resistant; gentR, gentamycin resistant; kanR, kanamycin resistant

\*to be submitted to Addgene

**Supplemental Table S3 Oligonucleotides and Synthetic DNA**

**Key**

| <b>Term</b> | <b>Description</b>                                 |
|-------------|----------------------------------------------------|
| Oligo #     | JMP lab accession number                           |
| Sequence    | Nucleotide sequence                                |
| Usage       | Procedure using this oligonucleotide/synthetic DNA |

| <b>Oligo #</b> | <b>Sequence<sup>a</sup></b>                                                 | <b>Usage</b>                           |
|----------------|-----------------------------------------------------------------------------|----------------------------------------|
| oJMP0193       | TCCTGAACGGCCATAAGAAC                                                        | amplifying kanR marker for swapping A  |
| oJMP0194       | GAGCGCTTTTGAAGCTGATG                                                        | amplifying kanR marker for swapping B  |
| oJMP1253       | CGGATAACAATTTACACAGGAAACAGACCATGAGCAAAGGAGAAGAACT                           | amplify GFP A                          |
| oJMP1254       | TGCATGCCTGCAGGTCGACTCTAGAGGATCTTTGTAGAGCTCATCCATGC                          | amplify GFP B                          |
| oJMP1255       | TTCCGGCAAGCAGGCATCGCCGTGGGTCACGACGAGATCCT                                   | remove NcoI sites from pJMP631 A       |
| oJMP1256       | GAGGATCTCGTGTGACCCACGGCGATGCCTGCTTGCCGA                                     | remove NcoI sites from pJMP631 C       |
| oJMP1257       | CTGACATGGGAATTAGCCACGGCATCACAGTATCGTGATG                                    | remove NcoI sites from pJMP631 D       |
| oJMP1258       | ATCACGATACTGTGATGCCGTGGCTAATTCCTCATGTCAGC                                   | remove NcoI sites from pJMP631 B       |
| oJMP1946       | TCCTGAACGGCCATAAGAACGAAGGCTGTCTGTTGAACTCTCGAGCCTTGTCCGCTTGCCTATAAATTTGCTCA  | apramycin (aprR) gblock                |
| oJMP2039       | AGCCATCGGAAGCTGTGGTATGGCTGTGCAGGTCGTAAAGACGTCTCATTAATCAGATAAAATATTATAAATGTG | making Pabst replicative vector gblock |
| oJMP2040       | TGATACCTCTGGCTCAGCG                                                         | making Pabst replicative vector A      |
| oJMP2041       | TTTACGACCTGCACAGCCAT                                                        | making Pabst replicative vector B      |
| oJMP2117       | TCCTGAACGGCCATAAGAACGAAGGCTGTCTGTTGAACTCTCGAGCCTTGTCCGCTTGCCTATAAATTTGCTCA  | hygromycin (hygR) gblock               |
| oJMP2134       | GCCTTCCGTTTGGGCCTAGAATTCGGTTTTAACAGGGAAGTGAGAGGGC                           | swapping to p15A ori A                 |
| oJMP2135       | TGGCTTGCAGCCCTTATGTCTCAGGCGCCACAAAACAGCAGGGAAGC                             | swapping to p15A ori B                 |
| oJMP2167       | CAAGAAGATCATCTTATTAATCAGATAAAATATTGACAAATGTGAGCGGATAACAAG                   | making PabstBR Quikchange primer       |
| oJMP2369       | CTAGAAACAAAACAGATGCGTTACGGAACCTTTACAAAACGAGACACTCTAACCCCTTG                 | PrpoE cloning A                        |
| oJMP2370       | TCGTCAAAGGTTAGAGTGTCTCGTTTTTGTAAAGTTCCGTAACGCATCTGTTTTGTTT                  | PrpoE cloning B                        |
| oJMP2539       | CACGCCGCTTTTTTACGCTCGCAGACTAGTCAGGCAGCCATCGGAAGCT                           | amplify MCS A                          |
| oJMP2540       | TGTCGACTAGGCCATGATGCTCATTCTGTGAAAAGGCCATCCGTCAGGAT                          | amplify MCS B                          |
| oJMP2541       | CACAGAATGAGCATCATGGC                                                        | amplify Tn7 cassette A                 |
| oJMP2542       | GGGTCAGTGAGCGAGGAAAG                                                        | amplify Tn7 cassette B                 |
| oJMP2543       | TTTAAACTTCATTTTTTAATTTTTGCGGCCGATCTGAAGATCAGCAGTTC                          | amplify R6k and oriT A                 |
| oJMP2544       | GGGCTCTCCGCTTCTCGCTCACTGACCCTATCAGAGCTTATCGGCCAG                            | amplify R6k and oriT B                 |

<sup>a</sup>all sequences are 5'-3'
